# Supplementary material
Source: HighWire-hosted journal article supplement (https://bmjopenquality.bmj.com/content/8/1/bmjoq-2018-000347)
Supplement: inline-supplementary-material-1 [file inline-supplementary-material-1.docx]

| **Ward:** | | | | | | | | | | | |
| --- | --- | --- | --- | --- | --- | --- | --- | --- | --- | --- | --- |
| **Area** | **Question** | **Bed:** | **Bed:** | **Bed:** | **Bed:** | **Bed:** | **Bed:** | **Bed:** | **Bed:** | **Bed:** | **Bed:** |
| **File** | Date of Admission |  |  |  |  |  |  |  |  |  |  |
| Date Treatment Started |  |  |  |  |  |  |  |  |  |  |
| Suspected or Confirmed PTB? |  |  |  |  |  |  |  |  |  |  |
| **Bed** | Face mask? *X = not seen*  *N = near (i.e. in bed space) W = worn (correctly, nose & mouth)* |  |  |  |  |  |  |  |  |  |  |
| Other attempt at isolation and signs? *X = no other attempts*  *I = isolated in side room E = end of ward/ away from pts S = sign r.e. airborne precautions O = other (please specify)* |  |  |  |  |  |  |  |  |  |  |
| **Ward:** | | | | | | | | | | | |
| **Area** | **Question** | **Bed:** | **Bed:** | **Bed:** | **Bed:** | **Bed:** | **Bed:** | **Bed:** | **Bed:** | **Bed:** | **Bed:** |
| **File** | Date of Admission |  |  |  |  |  |  |  |  |  |  |
| Date Treatment Started |  |  |  |  |  |  |  |  |  |  |
| Suspected or Confirmed PTB? |  |  |  |  |  |  |  |  |  |  |
| **Bed** | Face mask? *X = not seen*  *N = near (i.e. in bed space) W = worn (correctly, nose & mouth)* |  |  |  |  |  |  |  |  |  |  |
| Other attempt at isolation and signs? *X = no other attempts*  *I = isolated in side room E = end of ward/ away from pts S = sign r.e. airborne precautions O = other (please specify)* |  |  |  |  |  |  |  |  |  |  |

| **Name of person(s) collecting: Date:**   1. Look through all the notes on the ward to identify any patients with pulmonary TB. 2. Determine whether the patient is suspected of or diagnosed with pulmonary TB. *All patients suspected or diagnosed with active pulmonary TB should be included in this audit. Patients who are not infective (treated for more than 2 weeks, no pulmonary involvement, or Gene Xprt –ve) should be excluded.* 3. Check the patients’ file for date of admission, then the medication chart for the date TB medication was started (to see how long the patient has been on treatment – exclude if treatment has been for more than 2 weeks). 4. Check the patient’s bedspace for airborne precaution signs, surgical face mask use and attempts at isolation. 5. Once the audit is complete, use the Excel spreadsheet to enter the data and calculate summary percentages. |
| --- |

**Data Collection Tool (infection control adherence for infectious pulmonary TB)**
